# Supplementary material
Source: MDPI journal article supplement (https://www.mdpi.com/2073-4441/16/4/578)
Supplement: s1 [file s1]

### **Supplement Figure. 1**

non-freezing period to early freezing period (top) and freeze-thaw period (bottom)  
flux contribution zones.

### **Supplement Figure. 2**

Integrated CO<sub>2</sub>/H<sub>2</sub>O Open-Path Gas Analyzer & 3D Sonic Anemometer (left 1、  
right 1) Digital mining CR3000 (left 2).

### **Supplement Figure. 3**

High frequency water quality monitoring system sensors.

### **Supplement Figure. 4**

Zscore (FH<sub>2</sub>O) fitting.

### **Supplement Table. 1**

Name and abbreviation of high frequency meteorological-water quality monitoring  
index.

### **Supplement Table. 2**

Regression analysis of H<sub>2</sub>O fluxes and meteorological factors

### **Supplement Table. 3**

H<sub>2</sub>O fluxes Cumulative variance rate contribution

### **Supplement Table. 4**

Covariance analysis of H<sub>2</sub>O fluxes with environmental factors

### **Supplement Table. 5**

Zscore(FH<sub>2</sub>O) principal component

### **Supplement Table. 6**

Zscore(FH<sub>2</sub>O) principal component regression equation

### **Supplement Table. 7**

Zscore(FH<sub>2</sub>O) principal component regression equation covariance

**Supplement Table. 8**

Zscore(FH<sub>2</sub>O) principal component score coefficient matrix

**Supplement Table. 9**

Zscore(FH<sub>2</sub>O) regression equation fit

**Supplement Table. 10**

Zscore(FH<sub>2</sub>O) regression equation ANOVA

**Supplement Table. 11**

Average evapotranspiration at daily scale eddy and Dashetai station

**Supplement Table. 12**

Independent sample T test for evaporated water at daily scale eddy and Dashetai station

### 2.2.2 High frequency meteorological-water quality monitoring

Table.1 Name and abbreviation of high frequency meteorological-water quality monitoring index

| Indicator name                                                    | Abridge          |
|-------------------------------------------------------------------|------------------|
| Mean dissolved oxygen                                             | DOavg            |
| Mean turbidity from 0 to 30 cm below the water surface            | Turb1avg         |
| Mean turbidity at 30 to 60 cm below the water surface             | Turb2avg         |
| Mean turbidity at 60 to 90 cm below the water surface             | Turb3avg         |
| pH at 0 to 30 cm below water surface                              | pH1              |
| pH at 60 to 90 cm below water surface                             | pH3              |
| Mean water temperature                                            | WTavg            |
| Mean value of temperature at 0 to 30 cm below the water surface   | WT1avg           |
| Mean value of temperature at 30 to 60 cm below the water surface  | WT2avg           |
| Mean value of temperature at 60 to 90 cm below the water surface  | WT3avg           |
| Mean value of conductivity at 0 to 30 cm below the water surface  | EC1avg           |
| Mean value of conductivity at 30 to 60 cm below the water surface | EC2avg           |
| Mean value of conductivity at 60 to 90 cm below the water surface | EC3avg           |
| Carbon dioxide flux                                               | FCO <sub>2</sub> |
| Solar shortwave incident radiation at meteorological stations     | SWIN1            |
| Eddy station air pressure                                         | PA               |
| Eddy station humidity                                             | RH               |
| Eddy station air temperature                                      | TA               |
| Eddy station saturated water-air pressure difference              | VPD              |
| Eddy station wind speed                                           | WS               |
| Maximum wind speed at eddy station                                | MWS              |
| Eddy station evaporation                                          | ET               |
| Eddy station sensible heat flux                                   | H                |
| Latent heat flux at eddy station                                  | LE               |
| Maximum wind speed at weather station                             | MWS1             |
| Weather station barometric pressure                               | PA1              |
| Humidity at weather station                                       | RH1              |
| Weather station air temperature                                   | TA1              |

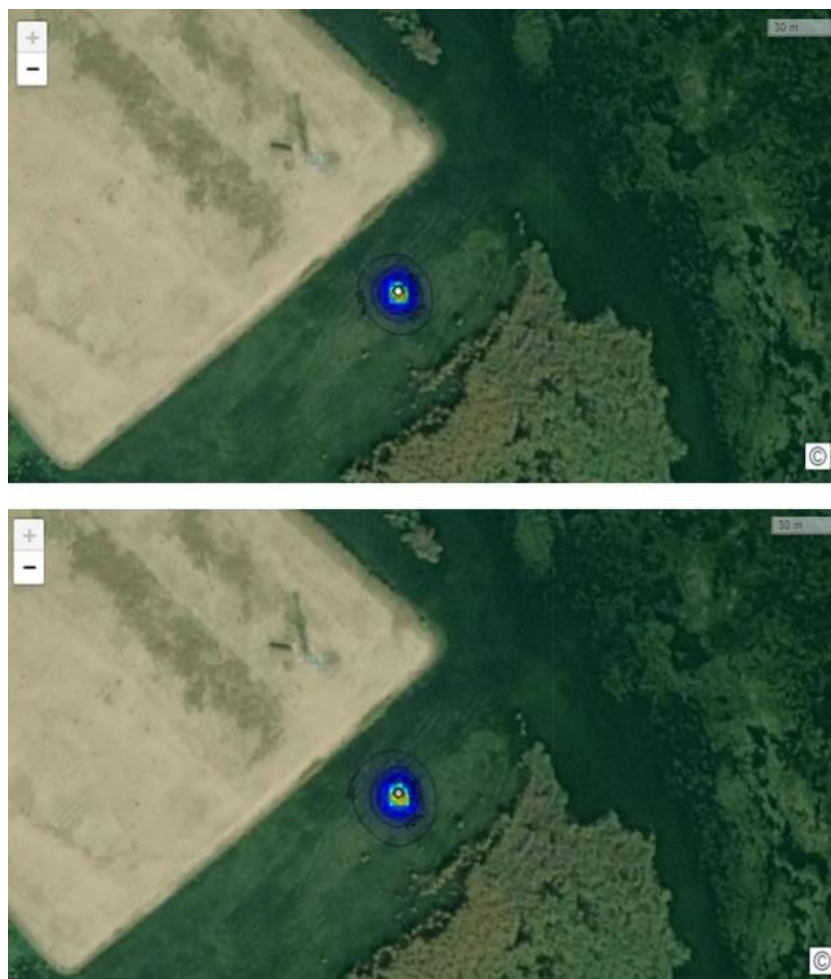

Fig.1 non-freezing period to early freezing period (top) and freeze-thaw period (bottom) flux contribution zones

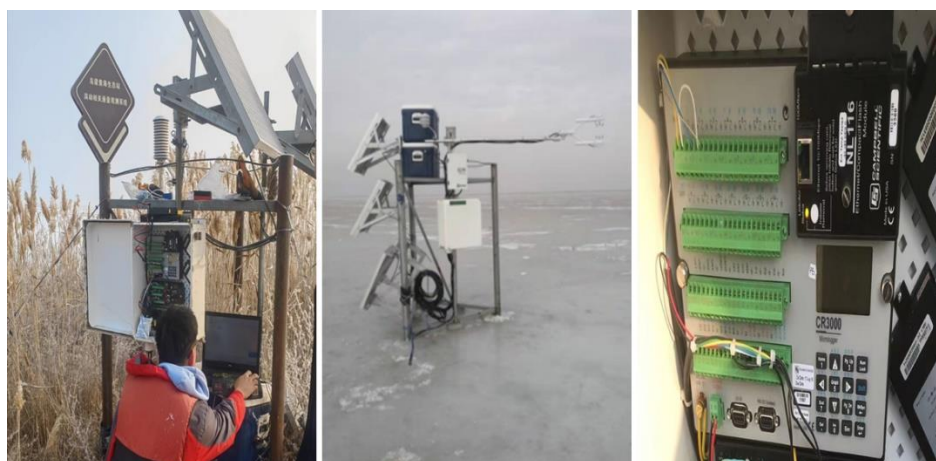

Fig.2 Integrated CO<sub>2</sub>/H<sub>2</sub>O Open-Path Gas Analyzer & 3D Sonic Anemometer (left 1、right 1) Digital mining CR3000 (left 2)

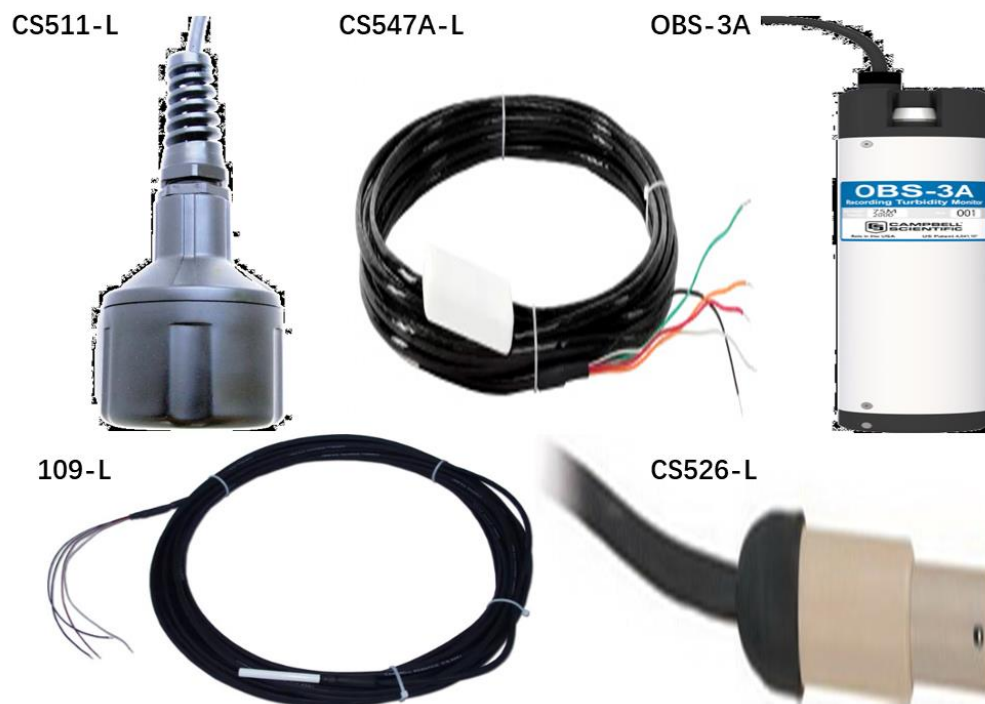

Fig.3 High frequency water quality monitoring system sensors

### 3.2.1 Correlation between overall scale FH<sub>2</sub>O and meteorological factors

Table.2 Regression analysis of H<sub>2</sub>O fluxes and meteorological factors

| R     | R <sup>2</sup> | F change quantity | Significant F change quantity |
|-------|----------------|-------------------|-------------------------------|
| 0.734 | 0.538          | 594.994           | 0                             |

a Predictive variables : ( constant ),RH,FCO<sub>2</sub>,WS,TA1,RH1,H,MWS1,SWN1,MWS

b Dependent variables :FH<sub>2</sub>O

### 3.2.2 Correlation between FH<sub>2</sub>O and environmental factors in the non-freezing period to early freezing period

The environmental factors affecting H<sub>2</sub>O flux are closely related to each other, and each factor has different effects on it. Due to the collinearity between the indicators, it may not be possible to draw correct conclusions in the analysis. The purpose of principal component analysis is to simplify the data and improve the reliability of the analysis results. Through linear transformation, some original indicators are combined into a few independent comprehensive indicators. In this paper, the influence of half-hour eddy meteorology water quality data on H<sub>2</sub>O flux during the non-freezing early glacial period ( May 17 to December 28,2018 ) was analyzed. In order to determine whether principal component analysis is needed, the data can be standardized first. The Zscore ( FH<sub>2</sub>O ), that is, the standardized H<sub>2</sub>O flux, is set as the dependent variable, and other standardized factors are used as independent variables. Linear regression is performed to perform collinearity diagnosis. The diagnostic results are shown in table 4. The variance inflation factor VIF has multiple variable values greater than 10, indicating that there is a high degree of collinearity, which requires principal component analysis.

Extracting the principal component needs to calculate the eigenvalues and eigenvectors of the matrix after obtaining the correlation coefficient matrix, and finally calculate the cumulative contribution rate.

Table.3 H<sub>2</sub>O fluxes Cumulative variance rate contribution

| principal component | eigenvalue | variance proportion | Cumulative % |
|---------------------|------------|---------------------|--------------|
| 1                   | 12.374     | 47.593              | 47.593       |
| 2                   | 2.836      | 10.908              | 58.501       |
| 3                   | 1.972      | 7.583               | 66.084       |
| 4                   | 1.747      | 6.718               | 72.803       |
| 5                   | 1.38       | 5.307               | 78.11        |
| 6                   | 1.054      | 4.053               | 82.163       |

Table.4 Covariance analysis of H<sub>2</sub>O fluxes with environmental factors

|                           | B      | Beta   | t      | significance | allowance | VIF      |
|---------------------------|--------|--------|--------|--------------|-----------|----------|
| (constant)                | 0.008  |        | 0.885  | 0.376        |           |          |
| Zscore(FCO <sub>2</sub> ) | -0.055 | -0.046 | -8.432 | 0            | 0.703     | 1.422    |
| Zscore(SWIN1)             | 0.016  | 0.017  | 1.602  | 0.109        | 0.182     | 5.482    |
| Zscore(PA)                | -0.112 | -0.095 | -1.234 | 0.217        | 0.004     | 284.355  |
| Zscore(RH)                | 0.012  | 0.008  | 1.195  | 0.232        | 0.442     | 2.264    |
| Zscore(TA)                | 0.016  | 0.011  | 0.277  | 0.782        | 0.014     | 71.318   |
| Zscore(VPD)               | 0.035  | 0.038  | 1.43   | 0.153        | 0.029     | 34.488   |
| Zscore(WS)                | 0.076  | 0.074  | 6.446  | 0            | 0.159     | 6.27     |
| Zscore(MWS)               | -0.007 | -0.007 | -0.55  | 0.582        | 0.135     | 7.398    |
| Zscore(ET)                | -0.024 | -0.024 | -0.881 | 0.378        | 0.028     | 36.276   |
| Zscore(H)                 | -0.016 | -0.018 | -2.221 | 0.026        | 0.318     | 3.149    |
| Zscore(LE)                | 0.903  | 0.92   | 33.213 | 0            | 0.027     | 36.574   |
| Zscore(MWS1)              | -0.006 | -0.007 | -0.822 | 0.411        | 0.285     | 3.511    |
| Zscore(PA1)               | 0.151  | 0.126  | 1.375  | 0.169        | 0.002     | 400.408  |
| Zscore(RH1)               | -0.021 | -0.024 | -1.936 | 0.053        | 0.137     | 7.287    |
| Zscore(TA1)               | -0.112 | -0.08  | -1.643 | 0.1          | 0.009     | 112.729  |
| Zscore(DOavg)             | 0.011  | 0.009  | 1.056  | 0.291        | 0.298     | 3.359    |
| Zscore(Turb1avg)          | -0.021 | -0.02  | -2.316 | 0.021        | 0.294     | 3.404    |
| Zscore(Turb2avg)          | -0.003 | -0.003 | -0.391 | 0.696        | 0.449     | 2.227    |
| Zscore(Turb3avg)          | -0.007 | -0.011 | -1.661 | 0.097        | 0.462     | 2.167    |
| Zscore(pH1)               | -0.01  | -0.01  | -1.143 | 0.253        | 0.283     | 3.54     |
| Zscore(pH3)               | 0.023  | 0.009  | 1.046  | 0.296        | 0.317     | 3.159    |
| Zscore(WT1avg)            | 0.163  | 0.123  | 0.786  | 0.432        | 0.001     | 1173.26  |
| Zscore(WT2avg)            | -0.341 | -0.265 | -1.098 | 0.272        | 0         | 2786.976 |
| Zscore(WT3avg)            | 0.341  | 0.267  | 1.715  | 0.086        | 0.001     | 1152.636 |
| Zscore(EC1avg)            | 0.056  | 0.038  | 0.509  | 0.611        | 0.004     | 260.276  |
| Zscore(EC2avg)            | -0.045 | -0.033 | -0.436 | 0.663        | 0.004     | 280.145  |
| Zscore(EC3avg)            | 0.018  | 0.018  | 1.161  | 0.246        | 0.091     | 11.016   |

a Dependent variables :Zscore(FH<sub>2</sub>O)

Table.5 Zscore(FH<sub>2</sub>O) principal component

| environmental factor      | principal component |        |        |        |        |        |
|---------------------------|---------------------|--------|--------|--------|--------|--------|
|                           | 1                   | 2      | 3      | 4      | 5      | 6      |
| Zscore(WT1avg)            | 0.967               | -0.169 | -0.04  | -0.023 | -0.037 | 0.111  |
| Zscore(WTavg)             | 0.967               | -0.169 | -0.041 | -0.022 | -0.037 | 0.112  |
| Zscore(WT2avg)            | 0.966               | -0.172 | -0.028 | -0.023 | -0.041 | 0.113  |
| Zscore(WT3avg)            | 0.963               | -0.173 | -0.024 | -0.017 | -0.048 | 0.116  |
| Zscore(TA1)               | 0.959               | -0.174 | -0.006 | -0.037 | -0.039 | 0.137  |
| Zscore(TA)                | 0.943               | -0.002 | -0.154 | -0.065 | 0.033  | -0.046 |
| Zscore(EC2avg)            | -0.911              | 0.139  | -0.008 | 0.07   | 0.035  | -0.147 |
| Zscore(VPD)               | 0.909               | 0.015  | -0.197 | -0.029 | 0.091  | -0.087 |
| Zscore(EC1avg)            | -0.901              | 0.151  | 0.008  | 0.07   | 0.054  | -0.149 |
| Zscore(EC3avg)            | -0.865              | 0.044  | -0.063 | 0.181  | 0.27   | -0.139 |
| Zscore(PA1)               | -0.79               | 0.205  | 0.085  | 0.034  | -0.068 | 0.492  |
| Zscore(PA)                | -0.689              | 0.298  | 0.002  | 0.028  | -0.087 | 0.557  |
| Zscore(Turb1avg)          | 0.654               | 0.038  | 0.009  | 0.014  | 0.272  | 0.409  |
| Zscore(pH3)               | -0.487              | 0.214  | 0.021  | 0.022  | -0.373 | 0.204  |
| Zscore(H)                 | 0.201               | 0.666  | -0.465 | -0.07  | -0.077 | -0.008 |
| Zscore(SWIN1)             | 0.357               | 0.659  | -0.521 | 0.043  | -0.095 | -0.042 |
| Zscore(MWS1)              | 0.372               | 0.647  | 0.204  | -0.365 | 0.082  | -0.21  |
| Zscore(RH1)               | -0.541              | -0.578 | 0.258  | 0.236  | -0.145 | 0.1    |
| Zscore(WS)                | 0.389               | 0.336  | 0.76   | 0.066  | 0.151  | -0.016 |
| Zscore(MWS)               | 0.414               | 0.487  | 0.658  | -0.09  | 0.197  | -0.068 |
| Zscore(ET)                | 0.546               | 0.269  | 0.227  | 0.674  | -0.139 | -0.018 |
| Zscore(LE)                | 0.556               | 0.264  | 0.223  | 0.669  | -0.138 | -0.02  |
| Zscore(FCO <sub>2</sub> ) | -0.242              | -0.316 | 0.261  | -0.491 | 0.317  | 0.068  |
| Zscore(Turb3avg)          | 0.364               | 0.208  | 0.238  | -0.45  | -0.321 | 0.097  |
| Zscore(Turb2avg)          | 0.259               | -0.109 | -0.208 | 0.365  | 0.712  | 0.086  |
| Zscore(RH)                | 0.257               | -0.433 | 0.132  | 0.084  | -0.455 | -0.257 |



### 3.3 Evaporation model from the non-glacial period to early glacial period

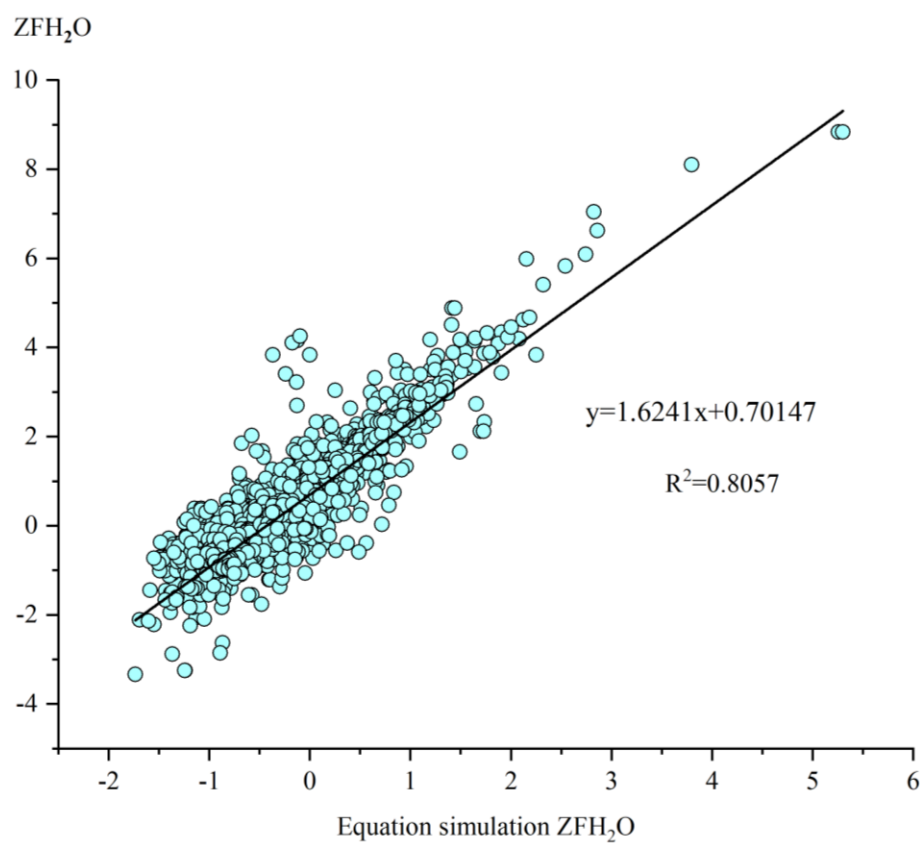

**Fig. 4.** Zscore (FH<sub>2</sub>O) fitting.

Table.6 Zscore(FH<sub>2</sub>O) principal component regression equation

| R    | R <sup>2</sup> | After adjustment R <sup>2</sup> | F variable quantity | Significant F variation |
|------|----------------|---------------------------------|---------------------|-------------------------|
| 0.93 | 0.866          | 0.865                           | 3451.6              | 0                       |

a Dependent variables :Zscore(FH<sub>2</sub>O)

b Predictive variables : ( constant ), Y6, Y5, Y4, Y3, Y2, Y1

Table.7 Zscore(FH<sub>2</sub>O) principal component regression equation covariance

|            | B      | Beta  | t       | significance | allowance | VIF |
|------------|--------|-------|---------|--------------|-----------|-----|
| (constant) | -0.039 |       | -6.151  | 0            |           |     |
| Y1         | 0.159  | 0.568 | 87.788  | 0            | 1         | 1   |
| Y2         | 0.159  | 0.272 | 42.012  | 0            | 1         | 1   |
| Y3         | 0.161  | 0.229 | 35.37   | 0            | 1         | 1   |
| Y4         | 0.472  | 0.633 | 97.865  | 0            | 1         | 1   |
| Y5         | -0.107 | -0.13 | -19.728 | 0            | 1         | 1   |
| Y6         | -0.028 | -0.03 | -4.495  | 0            | 1         | 1   |

a Dependent variables :Zscore(FH<sub>2</sub>O)

Table.8 Zscore(FH<sub>2</sub>O) principal component score coefficient matrix

|                           | 1      | 2      | 3      | 4      | 5      | 6      |
|---------------------------|--------|--------|--------|--------|--------|--------|
| Zscore(FCO <sub>2</sub> ) | -0.02  | -0.111 | 0.132  | -0.281 | 0.23   | 0.064  |
| Zscore(SWIN1)             | 0.029  | 0.233  | -0.264 | 0.024  | -0.069 | -0.04  |
| Zscore(PA)                | -0.056 | 0.105  | 0.001  | 0.016  | -0.063 | 0.529  |
| Zscore(RH)                | 0.021  | -0.153 | 0.067  | 0.048  | -0.329 | -0.244 |
| Zscore(TA)                | 0.076  | -0.001 | -0.078 | -0.037 | 0.024  | -0.043 |
| Zscore(VPD)               | 0.073  | 0.005  | -0.1   | -0.016 | 0.066  | -0.082 |
| Zscore(WS)                | 0.031  | 0.119  | 0.386  | 0.038  | 0.109  | -0.015 |
| Zscore(MWS)               | 0.033  | 0.172  | 0.334  | -0.052 | 0.143  | -0.065 |
| Zscore(ET)                | 0.044  | 0.095  | 0.115  | 0.386  | -0.101 | -0.017 |
| Zscore(H)                 | 0.016  | 0.235  | -0.236 | -0.04  | -0.056 | -0.007 |
| Zscore(LE)                | 0.045  | 0.093  | 0.113  | 0.383  | -0.1   | -0.019 |
| Zscore(MWS1)              | 0.03   | 0.228  | 0.104  | -0.209 | 0.059  | -0.2   |
| Zscore(PA1)               | -0.064 | 0.072  | 0.043  | 0.02   | -0.049 | 0.467  |
| Zscore(RH1)               | -0.044 | -0.204 | 0.131  | 0.135  | -0.105 | 0.095  |
| Zscore(TA1)               | 0.078  | -0.061 | -0.003 | -0.021 | -0.028 | 0.13   |
| Zscore(Turb1avg)          | 0.053  | 0.013  | 0.004  | 0.008  | 0.197  | 0.388  |
| Zscore(Turb2avg)          | 0.021  | -0.038 | -0.105 | 0.209  | 0.516  | 0.081  |
| Zscore(Turb3avg)          | 0.029  | 0.073  | 0.121  | -0.257 | -0.232 | 0.092  |
| Zscore(pH3)               | -0.039 | 0.075  | 0.011  | 0.013  | -0.27  | 0.194  |
| Zscore(WTavg)             | 0.078  | -0.06  | -0.021 | -0.012 | -0.027 | 0.106  |
| Zscore(WT1avg)            | 0.078  | -0.06  | -0.02  | -0.013 | -0.026 | 0.105  |
| Zscore(WT2avg)            | 0.078  | -0.061 | -0.014 | -0.013 | -0.03  | 0.107  |
| Zscore(WT3avg)            | 0.078  | -0.061 | -0.012 | -0.01  | -0.035 | 0.11   |
| Zscore(EC1avg)            | -0.073 | 0.053  | 0.004  | 0.04   | 0.039  | -0.141 |
| Zscore(EC2avg)            | -0.074 | 0.049  | -0.004 | 0.04   | 0.026  | -0.14  |
| Zscore(EC3avg)            | -0.07  | 0.016  | -0.032 | 0.104  | 0.196  | -0.132 |

Table.9 Zscore(FH<sub>2</sub>O) regression equation fit

|                    | intercept | slope  | statistics         |
|--------------------|-----------|--------|--------------------|
|                    | value     | value  | Adjusted R squared |
| ZFH <sub>2</sub> O | 0.70147   | 1.6241 | 0.8057             |

Table.10 Zscore(FH<sub>2</sub>O) regression equation ANOVA

| analysis of variance |             | DF   | quadratic sum | mean square | F ratio  | probability > F |
|----------------------|-------------|------|---------------|-------------|----------|-----------------|
| ZFH <sub>2</sub> O   | model       | 1    | 3858.594      | 3858.594    | 20510.76 | 0               |
|                      | error       | 4945 | 930.2796      | 0.18813     |          |                 |
|                      | grand total | 4946 | 4788.873      |             |          |                 |

### 4.3 Comparison of the model with evaporation dish conversion and regional empirical C formula method

Table.11 Average evapotranspiration at daily scale eddy and Dashetai station

|                     |            | Number of | Average standard |                    |        |
|---------------------|------------|-----------|------------------|--------------------|--------|
| peer group          |            | cases     | mean value       | standard deviation | error  |
| evaporated<br>water | EC station | 121       | 0.0935           | 0.0882             | 0.0080 |
|                     | Dashetai   |           |                  |                    |        |
|                     | station    | 197       | 0.2127           | 0.1256             | 0.0089 |

Table.12 Independent sample T test for evaporated water at daily scale eddy and Dashetai station

|                     |                                    | F      | significance | t      | p | Mean<br>value<br>difference | Standard<br>error<br>difference |
|---------------------|------------------------------------|--------|--------------|--------|---|-----------------------------|---------------------------------|
| evaporated<br>water | Assume equal variance              | 26.074 | 0            | -9.14  | 0 | -0.119                      | 0.0130                          |
|                     | No assumption of equal<br>variance |        |              | -9.916 | 0 | -0.119                      | 0.0120                          |
